# Supplementary material for: No evidence of HIV replication in children on antiretroviral therapy
Source: JCI journal article supplement (doi:10.1172/jci94582), 2017-09-10
Supplement: sd1 [file 1]

**Figure S1**

**A ZA001 (2.5 years of detectable viremia)**  
▲ 5.5 months on ART (DNA) (15.1 Months of age)  
▲ 8 years on ART (simulated DNA)

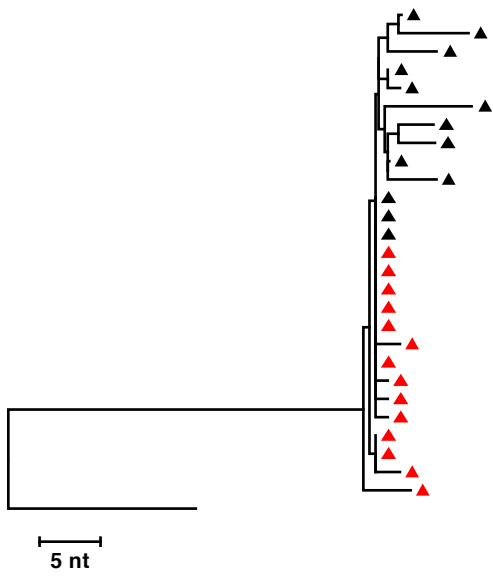

**B ZA002 (1.3 years of detectable viremia)**  
● 1.3 years on ART (Plasma RNA) (1.7 Months of age)  
▲ 7 years on ART (simulated DNA)

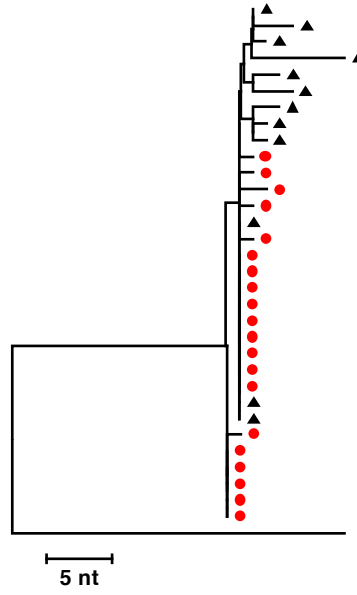

**Table S1: Participant and sample characteristics**

| Participant group                                 | PID                                                           | Gender | Pre-ART plasma HIV RNA <sup>a</sup> (c/mL) | ART regimen    | Age at ART initiation (months) | Age at baseline sample in months (sample type) | Age at long-term ART sample in months | Long-term ART plasma HIV RNA <sup>a</sup> (c/ml) | Baseline HIV DNA <sup>c</sup> (c/million PBMC) | Long-term ART HIV DNA <sup>c</sup> (c/million PBMC) | CD4% after long-term ART |    |
|---------------------------------------------------|---------------------------------------------------------------|--------|--------------------------------------------|----------------|--------------------------------|------------------------------------------------|---------------------------------------|--------------------------------------------------|------------------------------------------------|-----------------------------------------------------|--------------------------|----|
| Not suppressed on ART for part of sampling period | ZA001                                                         | Female | 696,000                                    | AZT/3TC/LPV/r  | 10.9                           | 14.5 (PBMC)                                    | 105.9                                 | <40                                              | 458.7                                          | 86.3                                                | 47                       |    |
|                                                   | ZA002                                                         | Male   | 654,000                                    | AZT/3TC/LPV/r  | 17.4                           | 1.8 (plasma)                                   | 99.7                                  | <40                                              | NA                                             | 32.8                                                | 33                       |    |
|                                                   | ZA003                                                         | Male   | >750,000                                   | ABC*/3TC/LPV/r | 1.8                            | 1.4 (plasma)                                   | 98.5                                  | <40                                              | NA                                             | 1.5                                                 | 21                       |    |
|                                                   | ZA004                                                         | Male   | >750,000                                   | AZT/3TC/LPV/r  | 2.7                            | 12.0 (PBMC)                                    | 107.8                                 | <40                                              | 2,431.1                                        | 23.6                                                | 46                       |    |
|                                                   | ZA005                                                         | Male   | >750,000                                   | AZT/3TC/LPV/r  | 6.0                            | 14.3 (PBMC)                                    | 102.4                                 | <40                                              | 435.3                                          | 9.2                                                 | 41                       |    |
|                                                   | Continuous suppression on ART for duration of sampling period | ZA006  | Female                                     | 635,000        | AZT/3TC/LPV/r                  | 9.0                                            | 14.4 (PBMC)                           | 98.3                                             | <40                                            | 340.4                                               | 46.7                     | 50 |
|                                                   |                                                               | ZA007  | Male                                       | >750,000       | AZT/3TC/EFV <sup>#</sup>       | 9.9                                            | 15.1 (PBMC)                           | 108.6                                            | <40                                            | 65.1                                                | 21.3                     | 35 |
|                                                   |                                                               | ZA008  | Female                                     | >750,000       | AZT/3TC/LPV/r                  | 2.2                                            | 26.1 (PBMC)                           | 83.4                                             | <40                                            | 1,567.7                                             | 42.3                     | 36 |
|                                                   |                                                               | ZA009  | Female                                     | >750,000       | AZT/3TC/EFV <sup>#</sup>       | 2.0                                            | 7.7 (PBMC)                            | 111.5                                            | <40                                            | 28,084.2                                            | 186.2                    | 29 |
|                                                   | ZA010                                                         | Female | 510,000                                    | AZT/3TC/LPV/r  | 1.8                            | 7.3 (PBMC)                                     | 101.8                                 | <40                                              | 63.4                                           | 4.5                                                 | 39                       |    |

<sup>a</sup> Roche Amplicor HIV Monitor assay version 1.0

<sup>b</sup> Abbott Diagnostics RealTime HIV-1 assay

<sup>c</sup> proviral copy number per million PBMCs measured by qPCR (15)

<sup>#</sup> 3 children had single drug switches for adverse effects, \* denoting an AZT to ABC switch and # denoting a LPV/r to EFV switch
